# Supplementary material for: Individualized Selection Criteria Based on Tumor Burden in Future Remnant Liver for Staged Hepatectomy of Advanced CRLM: Conventional TSH or ALPPS
Source: MDPI journal article supplement (doi:10.3390/cancers14143553), 2022-07-21
Supplement: s1 [file s1]

# Individualized Selection Criteria Based on Tumor Burden in Future Remnant Liver for Staged Hepatectomy of Advanced CRLM: Conventional TSH or ALPPS

Kun-Ming Chan \*, Hao-Chien Hung, Jin-Chiao Lee, Tsung-Han Wu, Yu-Chao Wang, Chih-Hsien Cheng, Chen-Fang Lee, Ting-Jung Wu, Hong-Shiue Chou and Wei-Chen Lee

**Table S1.** Univariate and multivariate analyses of clinicopathological factors affecting survival of patients after liver resection.

| Factors                                         | Univariate Analysis |             |         | Multivariate Analysis |         |
|-------------------------------------------------|---------------------|-------------|---------|-----------------------|---------|
|                                                 | HR                  | 95% CI      | p Value | HR (95% CI)           | p Value |
| Age (years), >60/≤60                            | 1.56                | 0.52–4.65   | 0.428   | -                     |         |
| Sex, Female/Male                                | 0.64                | 0.22–1.91   | 0.425   | -                     |         |
| BMI (kg/m <sup>2</sup> ), >25/≤25               | 1.60                | 0.58–4.46   | 0.365   | -                     |         |
| Comorbidity, Yes/No                             | 1.87                | 0.66–5.34   | 0.241   | -                     |         |
| Primary tumor, Rectum/Colon                     | 1.05                | 0.23–4.72   | 0.953   | -                     |         |
| Maximum tumor size (cm), ≥5/<5                  | 0.67                | 0.24–1.84   | 0.433   | -                     |         |
| Total tumor number, ≥5/<5                       | 1.18                | 0.37–3.74   | 0.778   | -                     |         |
| CEA (ng/mL), >100/≤100                          | 0.97                | 0.22–4.32   | 0.962   | -                     |         |
| Pre-operative chemotherapy, Yes/No              | 0.81                | 0.28–2.29   | 0.688   | -                     |         |
| Number of pre-operative chemotherapy, ≥6/<6     | 0.66                | 0.24–1.83   | 0.424   | -                     |         |
| Liver function test                             |                     |             |         |                       |         |
| AST(U/L), >30/≤30                               | 1.42                | 0.48–4.20   | 0.528   | -                     |         |
| ALT (U/L), >30/≤30                              | 1.55                | 0.51–4.73   | 0.440   | -                     |         |
| Alk-P (U/L), >105/≤105                          | 1.15                | 0.36–3.64   | 0.812   | -                     |         |
| Total Bilirubin (mg/dL), >1.0/≤1.0              | 0.05                | 0.01–269742 | 0.700   | -                     |         |
| Albumin (g/dL), >4.0/≤4.0                       | 0.53                | 0.19–1.49   | 0.226   | -                     |         |
| Prothrombin time (INR), >1.0/≤1.0               | 1.10                | 0.39–3.09   | 0.862   | -                     |         |
| Platelet count (10 <sup>3</sup> /μL), >200/≤200 | 1.01                | 0.32–3.18   | 0.992   | -                     |         |
| Type of staged hepatectomy, ALPPS/cTSH          | 0.03                | 0.01–7.30   | 0.214   | -                     |         |
| Completion of staged hepatectomy, Yes/No        | 0.24                | 0.07–0.76   | 0.015   | 0.24 (0.07–0.76)      | 0.015   |
| Post-operative chemotherapy                     |                     |             |         |                       |         |
| Regimen base, Oxaliplatin/Irinotecan            | 0.03                | 0.01–2.92   | 0.130   | -                     |         |
| Associated with bevacizumab, Yes/No             | 1.11                | 0.39–3.12   | 0.848   | -                     |         |
| Associated with cetuximab, Yes/No               | 1.02                | 0.35–3.01   | 0.966   | -                     |         |

HR: hazard ratio; CI: confidence interval; BMI, body mass index; CEA, carcinoembryonic antigen; AST, Aspartate aminotransferase; ALT, Alanine Aminotransferase; Alk-P, Alkaline phosphatase; INR, international normalized ratio; cTSH, conventional two-stage hepatectomy; ALPPS, associating liver partition and portal vein ligation for staged hepatectomy.
